# Supplementary material for: Replication Stress-Induced Chromosome Breakage Is Correlated with Replication Fork Progression and Is Preceded by Single-Stranded DNA Formation
Source: PubMed Central journal article supplement (PMC3276152; doi:10.1534/g3.111.000554), 2011-10-01
Supplement: supp_1.5.327_FigureS3.pdf [file supp_1.5.327_FigureS3.pdf]

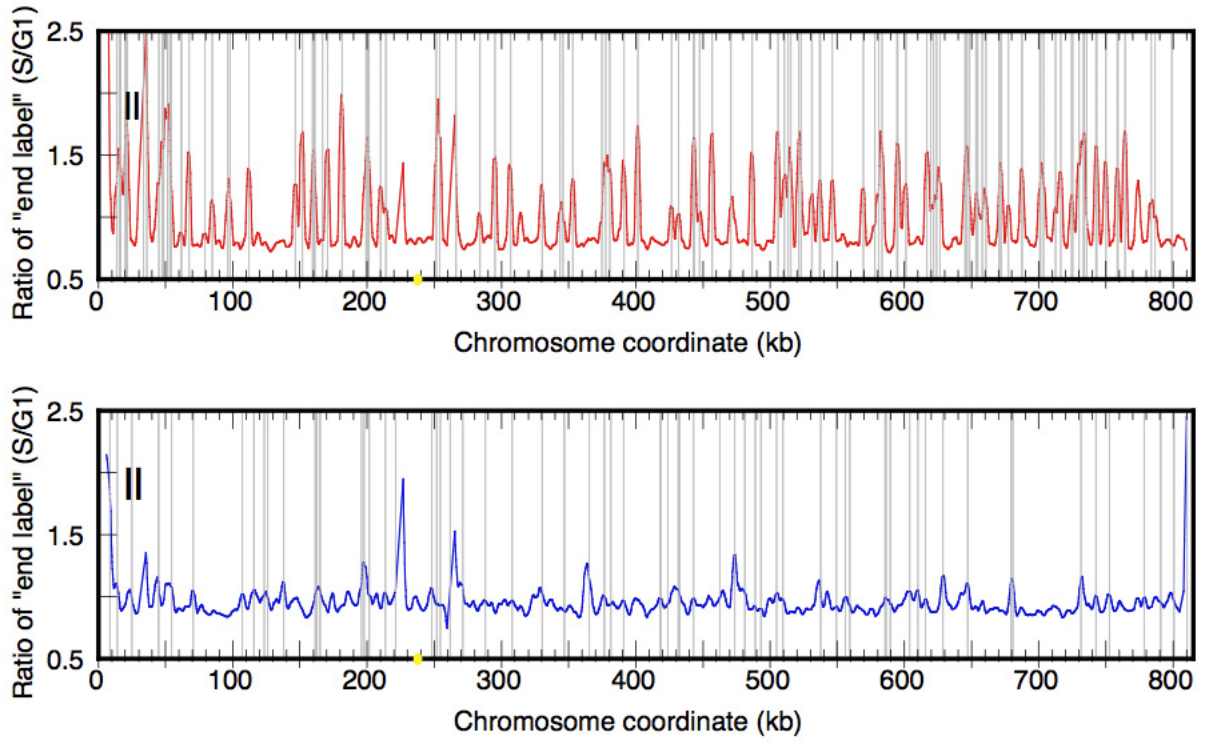

**Figure S3** Comparison between breakage profiles for Chr II of cells containing *Bam*HI (top) or *Fsp*I-induced (bottom) DNA ends. The yellow dots denote the centromere. Grey lines indicate positions of known restriction sites for *Bam*HI (top) or *Fsp*I (bottom).
